# Supplementary material
Source: PubMed Central journal article supplement (PMC3057355)
Supplement: NIHMS262352-supplement-02.pdf [file NIHMS262352-supplement-02.pdf]

**Supplementary Table 1. Conservation of JHAMT residues critical for interactions with the substrates**

| <i>A. aegypti</i>       | Q-14 | D-41 | D-69 | V-70 | I-95 | W-120 | L-146 | I-151 | I-154 | Y-155 | L-158 | S-176 | Y-178 | V-221 | V-224 | Activity           |
|-------------------------|------|------|------|------|------|-------|-------|-------|-------|-------|-------|-------|-------|-------|-------|--------------------|
| <i>D. melanogaster</i>  | =    | =    | =    | I    | =    | =     | =     | V     | V     | =     | =     | =     | L     | =     | I     | Yes for FA and JHA |
| <i>D. sechellia</i>     | =    | =    | =    | I    | =    | =     | =     | V     | V     | =     | =     | =     | L     | =     | I     | Not tested         |
| <i>D. erecta</i>        | =    | =    | =    | I    | =    | =     | =     | V     | V     | =     | =     | =     | L     | =     | I     | Not tested         |
| <i>D. yakuba</i>        | =    | =    | =    | I    | =    | =     | =     | V     | V     | =     | =     | =     | L     | =     | I     | Not tested         |
| <i>D. persimilis</i>    | =    | =    | =    | I    | =    | =     | =     | V     | V     | =     | =     | =     | L     | =     | I     | Not tested         |
| <i>D. pseudoobscura</i> | =    | =    | =    | I    | =    | =     | =     | V     | V     | =     | =     | =     | L     | =     | I     | Not tested         |
| <i>D. ananassae</i>     | =    | =    | =    | I    | =    | =     | =     | V     | V     | =     | =     | =     | L     | =     | I     | Not tested         |
| <i>D. willistoni</i>    | =    | =    | =    | I    | =    | =     | =     | V     | V     | =     | =     | =     | L     | F     | I     | Not tested         |
| <i>D. virilis</i>       | =    | =    | =    | I    | =    | =     | =     | V     | V     | =     | =     | =     | L     | =     | =     | Not tested         |
| <i>D. mojavensis</i>    | =    | =    | =    | =    | =    | =     | =     | =     | V     | =     | =     | =     | L     | =     | I     | Not tested         |
| <i>D. grimshawi</i>     | =    | =    | =    | =    | =    | =     | =     | V     | V     | =     | =     | =     | L     | =     | I     | Not tested         |

=: Identical amino acid. Letters show conserved substitutions. Shaded boxes indicate substitutions not present in any of the three species whose activities have been experimentally tested (*D. melanogaster*, *B. mori* and *T. castaneum*).

Accession numbers are: *D. melanogaster* (gi|24584607|), *D. pseudoobscura* (gi|125986291|), *D. sechellia*: GI:195343168), *Drosophila yakuba* (gi|195483745|), *D. erecta* (gi|194884267|), *D. ananassae* (gi|194766583|), *D. persimilis* (gi|195148723|), *Drosophila willistoni* (gi|195437877|), *Drosophila grimshawi* (gi|195063762|), *Drosophila virilis* (gi|195387143|), *Drosophila mojavensis* (gi|195115328|).
